# Supplementary material
Source: HighWire-hosted journal article supplement (http://www.ajnr.org/highwire/filestream/55401/field_highwire_adjunct_files/0/17-00217.pdf)
Supplement: 17-00217.pdf [file 17-00217.pdf]

**On-line Table 1: Patient characteristics by study**

| Study                                      | Treatment | Study Type    | No. of Patients | Age (yr) | Female Sex (%) | NIHSS | ASPECTS |
|--------------------------------------------|-----------|---------------|-----------------|----------|----------------|-------|---------|
| Mocco et al, <sup>13</sup> 2016            | Asp only  | Prospective   | 50              | 67       | 38             | 17    | 8       |
| Park et al, <sup>10</sup> 2016             | Asp only  | Retrospective | 32              | 70       | 44             | 11    | NA      |
| Eom et al, <sup>7</sup> 2014               | Asp only  | Retrospective | 32              | 68       | 31             | 20    | NA      |
| Hwang et al, <sup>8</sup> 2013             | Asp only  | Retrospective | 20              | 65       | 60             | 18    | 7       |
| Kang et al, <sup>11</sup> 2013 (period 1)  | Asp only  | Retrospective | 61              | 68       | 39             | 16    | 8       |
| Delgado Almandoz et al, <sup>15</sup> 2016 | ADAPT     | Retrospective | 45              | 66       | 38             | 19    | 9       |
| Hungerford et al, <sup>16</sup> 2016       | ADAPT     | Retrospective | 154             | 67       | 50             | 15    | NA      |
| Kabbasch et al, <sup>18</sup> 2016         | ADAPT     | Retrospective | 30              | 75       | 50             | 16    | NA      |
| Kim et al, <sup>20</sup> 2016              | ADAPT     | Retrospective | 25              | 71       | 32             | 15    | 8       |
| Kowoll et al, <sup>21</sup> 2016           | ADAPT     | Retrospective | 54              | 69       | 46             | 15    | NA      |
| Lapergue et al, <sup>22</sup> 2016         | ADAPT     | Retrospective | 124             | 64       | 51             | 16    | 9       |
| Mascitelli et al, <sup>27</sup> 2016       | ADAPT     | Retrospective | 76              | 70       | 62             | 18    | NA      |
| Romano et al, <sup>23</sup> 2016           | ADAPT     | Retrospective | 152             | 68       | 44             | 19    | 8       |
| Vargas et al, <sup>26</sup> 2016           | ADAPT     | Retrospective | 191             | 67       | 48             | 15    | NA      |
| Jankowitz et al, <sup>17</sup> 2015        | ADAPT     | Retrospective | 112             | 66       | 46             | 17    | 9       |
| Kim et al, <sup>9</sup> 2015               | ADAPT     | Retrospective | 70              | 72       | 46             | 11    | NA      |
| Turk et al, <sup>24</sup> 2014a            | ADAPT     | Retrospective | 98              | 66       | 53             | 17    | NA      |
| Turk et al, <sup>25</sup> 2014b            | ADAPT     | Retrospective | 64              | 69       | 59             | 17    | NA      |
| Turk et al, <sup>12</sup> 2014c            | ADAPT     | Retrospective | 37              | 65       | NA             | 16    | NA      |
| Kang et al, <sup>11</sup> 2013 (period 2)  | ADAPT     | Retrospective | 74              | 70       | 47             | 17    | 8       |
| Kang et al, <sup>19</sup> 2011             | ADAPT     | Retrospective | 22              | 59       | 36             | 18    | NA      |

**Note:**—Asp indicates aspiration; NA, not available.

**On-line Table 2: Occlusion location and complications by study**

| Study                                      | Treatment | No. of Patients | Anterior Circulation Occlusion (%) | Posterior Circulation Occlusion (%) | 90-Day Mortality (%) | sICH (%) | ENT (%) | IV-tPA (%) |
|--------------------------------------------|-----------|-----------------|------------------------------------|-------------------------------------|----------------------|----------|---------|------------|
| Mocco et al, <sup>13</sup> 2016            | Asp only  | 50              | 100                                | 0                                   | 12                   | 9        | NA      | 100        |
| Park et al, <sup>10</sup> 2016             | Asp only  | 32              | 100                                | 0                                   | 3                    | 0        | NA      | 94         |
| Eom et al, <sup>7</sup> 2014               | Asp only  | 32              | 0                                  | 100                                 | 25                   | 0        | 0       | 36         |
| Hwang et al, <sup>8</sup> 2013             | Asp only  | 20              | 100                                | 0                                   | 0                    | 15       | NA      | 71         |
| Kang et al, <sup>11</sup> 2013 (period 1)  | Asp only  | 61              | 100                                | 0                                   | NA                   | 8        | NA      | 53         |
| Delgado Almandoz et al, <sup>15</sup> 2016 | ADAPT     | 45              | 100                                | 0                                   | 18                   | 2        | 4       | 56         |
| Hungerford et al, <sup>16</sup> 2016       | ADAPT     | 154             | 100                                | 0                                   | 10                   | 7        | NA      | 35         |
| Kabbasch et al, <sup>18</sup> 2016         | ADAPT     | 30              | 94                                 | 6                                   | 20                   | 10       | 3       | 50         |
| Kim et al, <sup>20</sup> 2016              | ADAPT     | 25              | 100                                | 0                                   | 0                    | 4        | 0       | 52         |
| Kowoll et al, <sup>21</sup> 2016           | ADAPT     | 54              | 91                                 | 9                                   | NA                   | 4        | 6       | 81         |
| Lapergue et al, <sup>22</sup> 2016         | ADAPT     | 124             | 100                                | 0                                   | 23                   | 2        | 6       | 66         |
| Mascitelli et al, <sup>27</sup> 2016       | ADAPT     | 76              | 96                                 | 4                                   | NA                   | NA       | NA      | 50         |
| Romano et al, <sup>23</sup> 2016           | ADAPT     | 152             | 91                                 | 9                                   | 8                    | 8        | 2       | 52         |
| Vargas et al, <sup>26</sup> 2016           | ADAPT     | 191             | 90                                 | 10                                  | 15                   | NA       | 0       | 37         |
| Jankowitz et al, <sup>17</sup> 2015        | ADAPT     | 112             | 89                                 | 11                                  | 31                   | 3        | 4       | 41         |
| Kim et al, <sup>9</sup> 2015               | ADAPT     | 70              | 100                                | 0                                   | 3                    | 6        | NA      | 50         |
| Turk et al, <sup>24</sup> 2014a            | ADAPT     | 98              | 95                                 | 5                                   | 19                   | 0        | 0       | 28         |
| Turk et al, <sup>25</sup> 2014b            | ADAPT     | 64              | 90                                 | 10                                  | NA                   | NA       | NA      | 31         |
| Turk et al, <sup>12</sup> 2014c            | ADAPT     | 37              | 81                                 | 19                                  | NA                   | 5        | 0       | 32         |
| Kang et al, <sup>11</sup> 2013 (period 2)  | ADAPT     | 74              | 100                                | 0                                   | NA                   | 5        | NA      | 53         |
| Kang et al, <sup>19</sup> 2011             | ADAPT     | 22              | 82                                 | 18                                  | 14                   | 9        | 0       | 34         |

**Note:**—Asp indicates aspiration; ENT, embolic occlusion in new territories; NA, not available; sICH, symptomatic intracerebral hemorrhage.

**On-line Table 3: Patient characteristics for ADAPT with aspiration only or ADAPT with adjuvant treatment by study**

| Study                              | Treatment                   | No. of Patients | Age (yr) | Female Sex (%) | NIHSS |
|------------------------------------|-----------------------------|-----------------|----------|----------------|-------|
| Kabbasch et al, <sup>18</sup> 2016 | ADAPT-asp only              | 21              | 76       | 52             | 17    |
| Kowoll et al, <sup>21</sup> 2016   | ADAPT-asp only              | 30              | 72       | 57             | 14    |
| Romano et al, <sup>23</sup> 2016   | ADAPT-asp only              | 96              | 68       | 42             | 19    |
| Vargas et al, <sup>26</sup> 2016   | ADAPT-asp only              | 145             | 65       | NA             | 15    |
| Kabbasch et al, <sup>18</sup> 2016 | ADAPT-asp+adjuvant          | 9               | 71       | 44             | 16    |
| Kowoll et al, <sup>21</sup> 2016   | ADAPT-asp+adjuvant          | 24              | 59       | 67             | 16    |
| Romano et al, <sup>23</sup> 2016   | ADAPT-asp+adjuvant          | 56              | 68       | 46             | 18    |
| Vargas et al, <sup>26</sup> 2016   | ADAPT-asp+adjuvant          | 43              | 72       | NA             | 16    |
| Kabbasch et al, <sup>18</sup> 2016 | <i>P</i> value <sup>a</sup> |                 | .4       | 1              | .5    |
| Kowoll et al, <sup>21</sup> 2016   | <i>P</i> value <sup>a</sup> |                 | .2       | .1             | .1    |
| Romano et al, <sup>23</sup> 2016   | <i>P</i> value <sup>a</sup> |                 | .64      | .57            | .3    |
| Vargas et al, <sup>26</sup> 2016   | <i>P</i> value <sup>a</sup> |                 | .0019    | NA             | .72   |

**Note:**—asp indicates aspiration; NA, not available.

<sup>a</sup>The *P* values represent difference between ADAPT-asp only treatment and ADAPT-asp+adjuvant treatment.

**On-line Table 4: Treatment characteristics and outcomes for ADAPT with aspiration only or ADAPT with adjuvant treatment by study**

| Study                              | Treatment                   | No. of Patients | IV-tPA (%) | OTP (min) | PTR (min) | Final TICl 2b/3 (%) | 90-Day mRS≤2 (%) | 90-Day Mortality (%) | sICH (%) | ENT (%) |
|------------------------------------|-----------------------------|-----------------|------------|-----------|-----------|---------------------|------------------|----------------------|----------|---------|
| Kabbasch et al, <sup>18</sup> 2016 | ADAPT-asp only              | 21              | 52         | 194       | 20        | 95                  | 38               | 19                   | 0        | 5       |
| Kowoll et al, <sup>21</sup> 2016   | ADAPT-asp only              | 30              | 27         | 174       | 30        | 97                  | NA               | NA                   | 3        | 7       |
| Romano et al, <sup>23</sup> 2016   | ADAPT-asp only              | 96              | 51         | NA        | 45        | 83                  | 57               | 6                    | 4        | 2       |
| Vargas et al, <sup>26</sup> 2016   | ADAPT-asp only              | 145             | NA         | 483       | 30        | 97                  | 58               | 14                   | NA       | 0       |
| Kabbasch et al, <sup>18</sup> 2016 | ADAPT-asp+adjuvant          | 9               | 56         | 176       | 60        | 78                  | 56               | 22                   | 33       | 0       |
| Kowoll et al, <sup>21</sup> 2016   | ADAPT-asp+adjuvant          | 24              | 92         | 232       | 65        | 88                  | NA               | NA                   | 4        | 4       |
| Romano et al, <sup>23</sup> 2016   | ADAPT-asp+adjuvant          | 56              | 50         | NA        | 80        | 54                  | 40               | 11                   | 14       | 2       |
| Vargas et al, <sup>26</sup> 2016   | ADAPT-asp+adjuvant          | 43              | NA         | 408       | 61        | 84                  | 43               | 18                   | NA       | 0       |
| Kabbasch et al, <sup>18</sup> 2016 | <i>P</i> value <sup>a</sup> |                 | 1          | 0.6       | <.0001    | .2                  | .7               | 1                    | .02      | 1       |
| Kowoll et al, <sup>21</sup> 2016   | <i>P</i> value <sup>a</sup> |                 | .2         | NA        | .0004     | .3                  | NA               | NA                   | 1        | 1       |
| Romano et al, <sup>23</sup> 2016   | <i>P</i> value <sup>a</sup> |                 | .9         | NA        | <.001     | <.001               | .026             | .32                  | .026     | NA      |
| Vargas et al, <sup>26</sup> 2016   | <i>P</i> value <sup>a</sup> |                 | NA         | .23       | <.0001    | NA                  | .12              | .47                  | NA       | NA      |

**Note:**—asp indicates aspiration; ENT, embolic occlusion in new territories; NA, not available; OTP, onset-to-puncture; PTR, puncture-to-recanalization; sICH, symptomatic intracerebral hemorrhage.

<sup>a</sup>The *P* values represent difference between ADAPT-asp only treatment and ADAPT-asp+adjuvant treatment.

**On-line Table 5: Recanalization and clinical outcomes by study**

| Outcomes         | ADAPT Meta-Analysis (n = 1328, 1161) | Thrombectomy Meta-Analysis <sup>28</sup> (n = 570, 633) | MR CLEAN (n = 267) | REVASCAT (n = 103) | SWIFT PRIME (n = 98) | EXTEND IA (n = 35) |
|------------------|--------------------------------------|---------------------------------------------------------|--------------------|--------------------|----------------------|--------------------|
| TICl 2b/3 (%)    | 89.1                                 | 70.5                                                    | 58.7               | 66.0               | 88.0                 | 86.0               |
| 90-day mRS≤2 (%) | 51.4                                 | 46.0                                                    | 32.6               | 44.0               | 60.0                 | 71.0               |

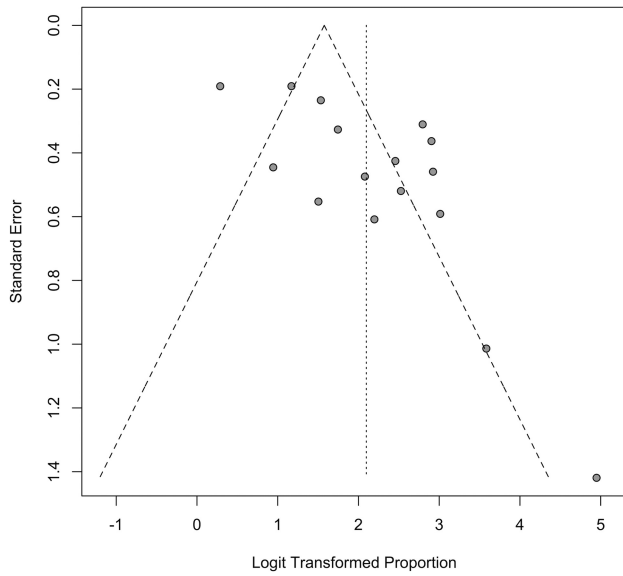

**ON-LINE FIG 1.** Funnel plot on publication bias for TICl 2b/3 recanalization rates across studies.

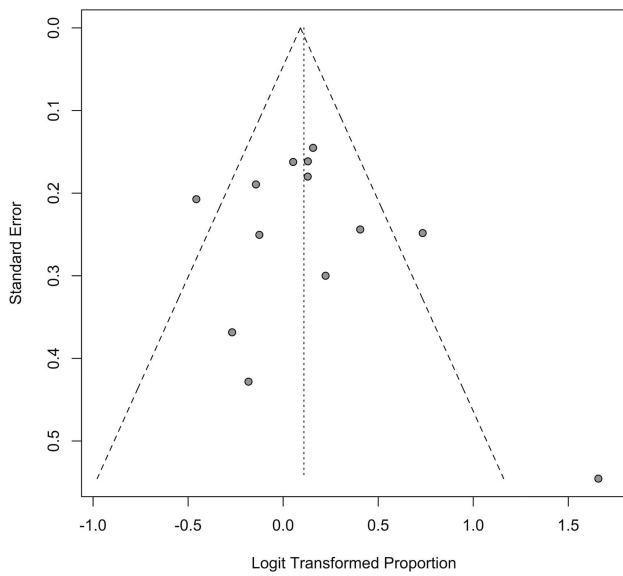

**ON-LINE FIG 2.** Funnel plot on publication bias for good clinical outcome (90-day mRS  $\leq 2$ ) across studies.
